# Supplementary material for: Metabolic Characterization of Antifolate Responsiveness and Non-responsiveness in Malignant Pleural Mesothelioma Cells
Source: Front Pharmacol. 2018 Oct 12;9:1129. doi: 10.3389/fphar.2018.01129 (PMC6194193; doi:10.3389/fphar.2018.01129)
Supplement: Supplementary file 8 [file Table_1.XLSX]

## Sheet: STable 1
Supplementary TABLE 1. Expression level of enzyme genes in one-carbon metabolism
	MSTO-211H		TCC-MESO2		NCI-H2452
	Average	SD	Average	SD	Average	SD
DHFR	0.00823003	0.000743032	0.0115471	0.00157391	0.00176875	0.00029322
GART	0.0262648	0.00377193	0.0170307	0.00198709	0.000740129	0.000132221
GLDC	0.00358422	0.000154058	0.00475786	0.00231729	3.2773e-05	2.24901e-05
HPRT1	0.00609385	0.00102083	0.00815449	0.000884207	0.00495993	0.00143757
MTHFD1	0.00495106	0.0021869	0.0109202	0.00184073	0.00438614	0.000108675
MTHFD1L	0.000487441	0.000118369	0.00150281	8.96439e-05	0.00118567	0.000123754
MTHFD2	0.0511818	0.00144644	0.0420867	0.00106481	0.025157	0.000426701
MTHFD2L	0.00114592	0.000149946	0.000265111	0.000155279	0.000119289	6.1779e-05
MTHFR	0.000165052	4.43936e-05	0.000447762	6.78907e-05	0.00013303	3.94247e-05
MTHFS	0.00996419	0.000897113	0.00802943	7.87006e-05	0.00412286	5.83919e-05
MTR	0.00243227	7.86653e-05	0.00560506	7.10124e-05	0.00359646	0.000398342
MTRR	0.0149604	0.000939203	0.00648216	0.000555081	0.0128488	0.00151097
SHMT1	0.00375197	3.36113e-05	0.175681	0.0209252	0.00242982	5.25752e-05
SHMT2	0.00880557	0.00314434	0.0856018	0.0155586	0.0489233	0.00192819
TK1	0.0279616	0.000565601	0.0657726	0.00492137	0.0279865	0.00231592
TYMS	0.113676	0.0169985	0.0910857	0.0054572	0.04897	0.00332284
MTAP	0.00421549	0.000151061	0.00989017	0.0004015	0	0
Normalized to GAPDH
